# Supplementary material for: Analysis of Fungal Diversity, Physicochemical Properties and Volatile Organic Compounds of Strong-Flavor Daqu from Seven Different Areas
Source: MDPI journal article supplement (doi:10.3390/foods13081263), 2024-04-20
Supplement: s1 [file s1]

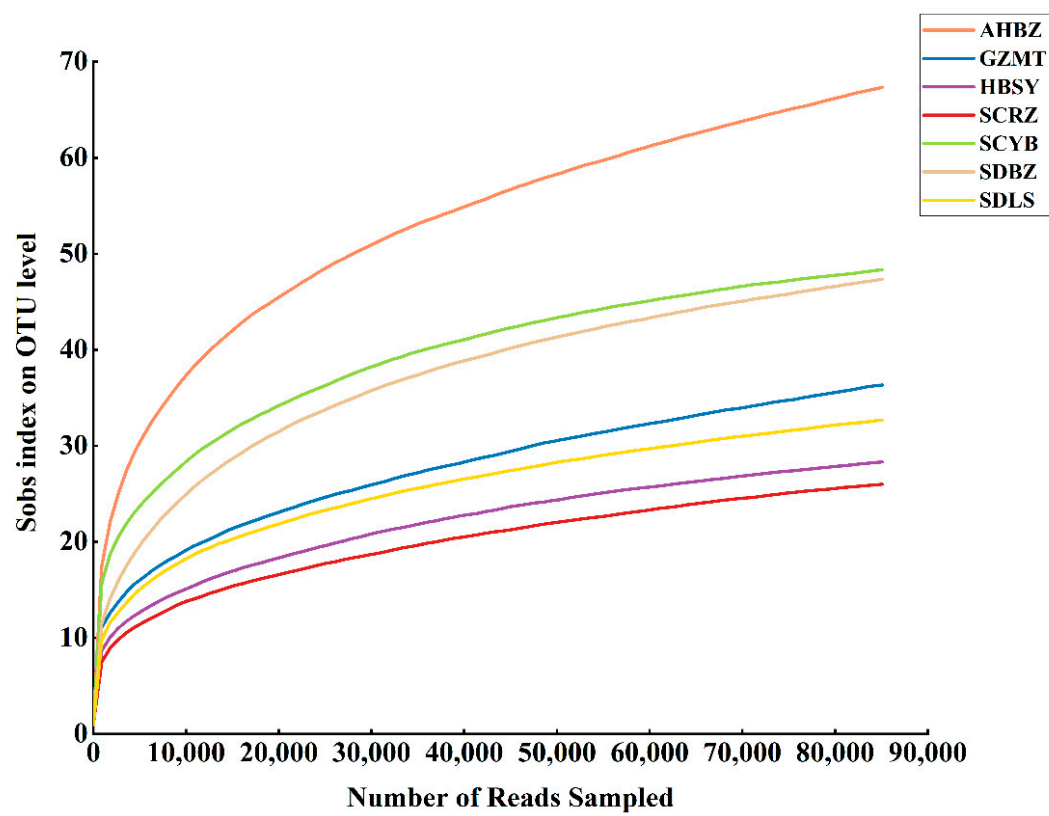

**Figure S1:** Rarefaction curves of fungal diversity.

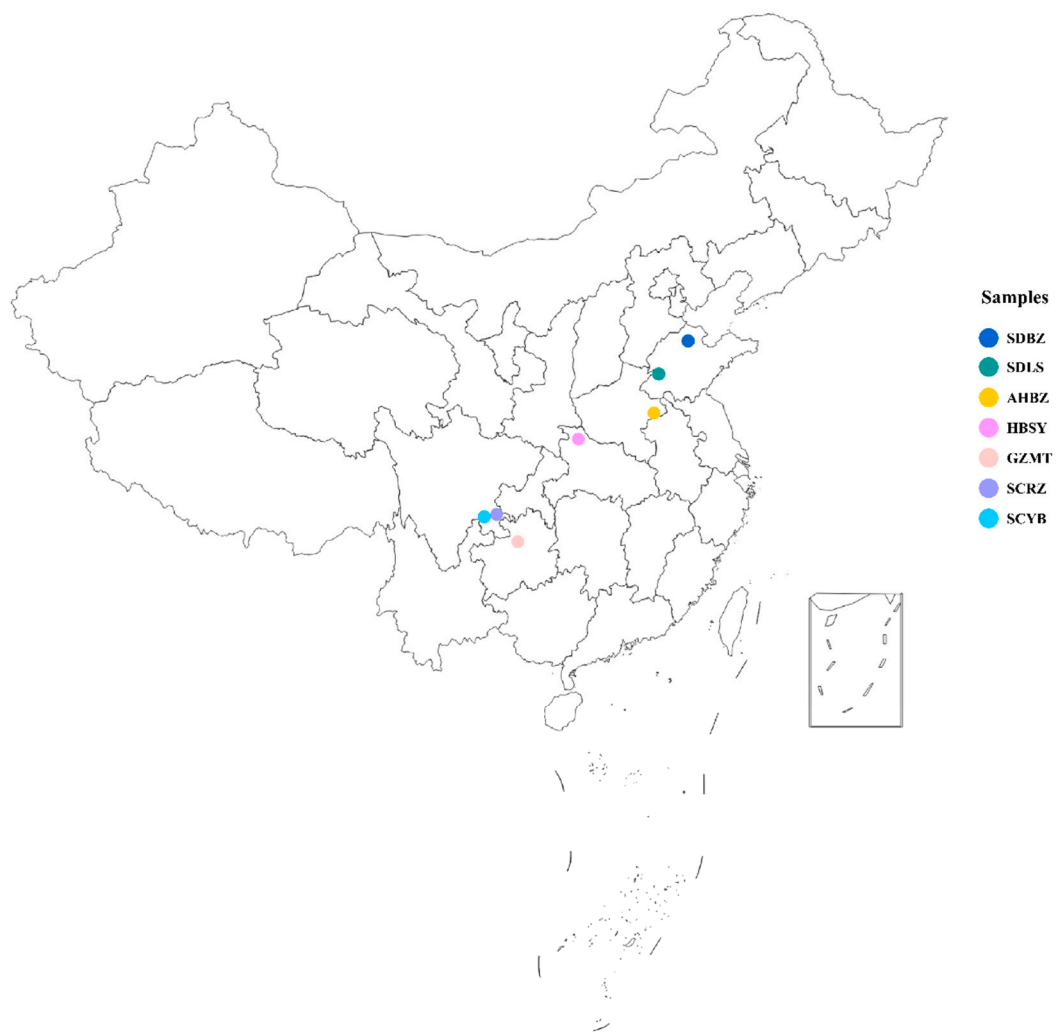

**Figure S2:** Sampling point distribution map.

Table S1. Concentration of VOCs in Daqu samples.

| Compound                 | Basis of<br>identification | CAS       | RI   | Concentration (mg/kg) |             |             |             |             |             |             |
|--------------------------|----------------------------|-----------|------|-----------------------|-------------|-------------|-------------|-------------|-------------|-------------|
|                          |                            |           |      | AHBZ                  | GZMT        | HBSY        | SCRZ        | SCYB        | SDBZ        | SDLS        |
| Alcohols                 |                            |           |      |                       |             |             |             |             |             |             |
| 1-Hexanol                | MS, RI                     | 111-27-3  | 1359 | 0.321±0.049           | 0.115±0.047 | 0.022±0.008 | 0.113±0.032 | 0.019±0.002 | 0.107±0.03  | 0.088±0.027 |
| 1-Octen-3-ol             | MS, RI                     | 3391-86-4 | 1456 | 0.074±0.028           | ND          | 0.014±0.002 | 0.026±0.001 | 0.014±0.007 | 0.047±0.034 | 0.048±0.016 |
| 2-Ethylhexanol           | MS, RI                     | 104-76-7  | 1484 | 0.071±0.011           | 0.046±0.004 | ND          | 0.074±0.004 | 0.06±0.003  | 0.139±0.025 | 0.087±0.022 |
| Linalool                 | MS, RI                     | 78-70-6   | 1552 | ND                    | ND          | 0.016±0.006 | ND          | 0.013±0.003 | 0.063±0.017 | 0.013±0.003 |
| 1-Octanol                | MS, RI                     | 111-87-5  | 1564 | 0.067±0.033           | ND          | ND          | ND          | ND          | 0.072±0.002 | 0.058±0.009 |
| Cyclooctanol             | MS, RI                     | 696-71-9  | 1640 | ND                    | ND          | ND          | 0.018±0.001 | ND          | 0.06±0.012  | 0.243±0.064 |
| 1-Nonanol                | MS, RI                     | 143-08-8  | 1666 | 0.044±0.014           | ND          | 0.016±0.004 | ND          | 0.027±0.004 | 0.049±0.009 | 0.046±0.027 |
| 2-Phenyl-2-propanol      | MS, RI                     | 617-94-7  | 1776 | ND                    | 0.004±0.002 | ND          | ND          | 0.009±0.001 | 0.017±0.009 | ND          |
| Benzyl alcohol           | MS, RI                     | 100-51-6  | 1885 | ND                    | ND          | 0.076±0.026 | 0.068±0.015 | 0.061±0.004 | ND          | 0.044±0.015 |
| Benzeneethanol           | MS, RI                     | 60-12-8   | 1922 | 0.527±0.242           | 2.615±0.994 | 1.111±0.343 | 0.875±0.243 | 1.972±0.132 | 1.052±0.248 | 2.825±0.815 |
| β-Ethylphenethyl Alcohol | MS, RI                     | 2035-94-1 | 1950 | ND                    | ND          | 0.014±0.007 | ND          | 0.012±0.001 | 0.017±0.009 | ND          |
| Σ                        |                            |           |      | 1.081±0.377           | 2.727±0.971 | 1.256±0.397 | 1.167±0.295 | 2.188±0.147 | 1.599±0.378 | 3.452±0.976 |
| Acids                    |                            |           |      |                       |             |             |             |             |             |             |
| Isovaleric acid          | MS, RI                     | 503-74-2  | 1679 | ND                    | 0.024±0.016 | 0.01±0.005  | ND          | 0.076±0.018 | 1.076±0.31  | 0.105±0.035 |
| Hexanoic acid            | MS, RI                     | 142-62-1  | 1849 | 0.348±0.227           | ND          | ND          | ND          | ND          | ND          | ND          |
| Heptanoic acid           | MS, RI                     | 111-14-8  | 1971 | ND                    | 0.016±0.006 | ND          | ND          | ND          | 0.052±0.024 | 0.004±0     |
| Octanoic acid            | MS, RI                     | 124-07-2  | 2070 | ND                    | ND          | ND          | ND          | ND          | ND          | 0.02±0.012  |
| Nonanoic acid            | MS, RI                     | 112-05-0  | 2169 | 0.022±0.011           | ND          | ND          | ND          | ND          | 0.027±0.011 | ND          |
| Phenylacetic acid        | MS, RI                     | 103-82-2  | 2592 | ND                    | ND          | 0.026±0.01  | ND          | ND          | ND          | 0.023±0.006 |
| Palmitic acid            | MS, RI                     | 57-10-3   | 2930 | 0.139±0.043           | 0.109±0.041 | 0.084±0.013 | 0.104±0.022 | 0.157±0.022 | 0.33±0.077  | 0.245±0.056 |
| Σ                        |                            |           |      | 0.393±0.297           | 0.149±0.055 | 0.12±0.024  | 0.104±0.022 | 0.233±0.037 | 1.485±0.42  | 0.397±0.109 |

|                                |        |            |      |             |             |             |             |             |             |             |
|--------------------------------|--------|------------|------|-------------|-------------|-------------|-------------|-------------|-------------|-------------|
| Esters                         |        |            |      |             |             |             |             |             |             |             |
| Ethyl caproate                 | MS, RI | 123-66-0   | 1246 | 0.053±0.021 | 0.028±0.009 | ND          | ND          | 0.016±0.001 | 0.053±0.003 | 0.039±0.012 |
| Ethyl caprylate                | MS, RI | 106-32-1   | 1441 | ND          | 0.035±0.011 | ND          | ND          | ND          | 0.024±0.01  | 0.014±0.008 |
| Ethyl nonylate                 | MS, RI | 123-29-5   | 1541 | 0.022±0.006 | ND          | ND          | ND          | ND          | 0.052±0.016 | 0.023±0.013 |
| Ethyl caprate                  | MS, RI | 110-38-3   | 1643 | 0.017±0.007 | 0.02±0.011  | 0.01±0      | 0.016±0.009 | ND          | ND          | 0.021±0.006 |
| Phenethyl acetate              | MS, RI | 103-45-7   | 1825 | ND          | ND          | ND          | ND          | ND          | ND          | 0.022±0.007 |
| Ethyl laurate                  | MS, RI | 106-33-2   | 1847 | ND          | 0.027±0.01  | 0.023±0.01  | 0.02±0.009  | 0.016±0.003 | 0.074±0.012 | 0.031±0.011 |
| γ-Nonanoic lactone             | MS, RI | 104-61-0   | 2018 | 0.1±0.036   | 0.095±0.043 | ND          | ND          | 0.031±0.007 | 0.24±0.053  | ND          |
| Ethyl myristate                | MS, RI | 124-06-1   | 2070 | 0.449±0.077 | 0.118±0.052 | 0.114±0.028 | 0.075±0.022 | 0.075±0.003 | 0.174±0.033 | 0.121±0.044 |
| Pentadecanoic acid ethyl ester | MS, RI | 41114-00-5 | 2179 | 0.098±0.004 | 0.038±0.018 | 0.042±0.009 | 0.035±0.013 | 0.029±0.002 | 0.059±0.007 | 0.065±0.011 |
| Ethyl Palmitate                | MS, RI | 628-97-7   | 2270 | 2.788±0.522 | 1.801±0.309 | 1.495±0.176 | 1.183±0.198 | 1.597±0.244 | 2.987±0.496 | 2.117±0.211 |
| Ethyl hexadec-9-enoate         | MS, RI | 54546-22-4 | 2267 | 0.164±0.033 | 0.24±0.096  | 0.132±0.006 | 0.071±0.011 | 0.06±0.01   | 0.67±0.026  | 0.146±0.05  |
| 1,2-Dimethyl phthalate         | MS, RI | 131-11-3   | 2325 | ND          | 0.014±0.005 | 0.017±0.01  | ND          | 0.006±0.001 | 0.044±0.004 | 0.007±0.003 |
| Octadecanoic acid ethyl ester  | MS, RI | 111-61-5   | 2455 | 0.103±0.027 | 0.021±0.009 | 0.018±0.001 | 0.023±0.001 | 0.025±0.003 | 0.078±0.031 | 0.062±0.019 |
| Ethyl oleate                   | MS, RI | 111-62-6   | 2484 | 1.272±0.291 | 0.387±0.082 | 0.587±0.05  | 0.497±0.145 | 0.358±0.057 | 0.961±0.181 | 0.59±0.15   |
| Linoleic acid ethyl ester      | MS, RI | 544-35-4   | 2515 | 0.961±0.197 | 0.396±0.071 | 0.647±0.055 | 0.581±0.128 | 0.49±0.078  | 0.639±0.123 | 0.989±0.265 |
| Diisobutyl phthalate           | MS, RI | 84-69-5    | 2592 | 0.081±0.02  | 0.057±0.019 | 0.059±0.015 | 0.045±0.024 | 0.027±0.008 | 0.044±0.012 | 0.029±0.004 |
| Σ                              |        |            |      | 6.048±1.277 | 2.399±0.619 | 3.133±0.324 | 2.144±0.386 | 2.731±0.405 | 5.854±1.26  | 4.262±0.801 |
| Aldehydes                      |        |            |      |             |             |             |             |             |             |             |
| Acetal                         | MS, RI | 105-57-7   | 889  | ND          | ND          | ND          | ND          | 0.061±0.001 | ND          | 0.031±0.013 |
| Hexanal                        | MS, RI | 66-25-1    | 1083 | 0.132±0.06  | 0.076±0.028 | ND          | 0.009±0.001 | 0.05±0.004  | 0.047±0.032 | 0.048±0.023 |
| Nonanal                        | MS, RI | 124-19-6   | 1392 | 0.043±0.012 | ND          | 0.019±0.002 | 0.054±0.016 | 0.042±0.005 | 0.1±0.021   | 0.115±0.052 |
| 2-Furaldehyde                  | MS, RI | 98-01-1    | 1467 | ND          | ND          | ND          | 0.021±0.004 | 0.034±0.004 | ND          | 0.035±0.007 |
| Decanal                        | MS, RI | 112-31-2   | 1498 | 0.013±0.007 | 0.017±0.012 | 0.01±0.003  | 0.022±0.009 | 0.006±0.003 | 0.041±0.007 | 0.015±0.007 |
| Benzaldehyde                   | MS, RI | 100-52-7   | 1520 | ND          | ND          | ND          | 0.287±0.056 | 0.261±0.069 | ND          | 0.243±0.076 |
| (E)-non-2-enal                 | MS, RI | 18829-56-6 | 1542 | 0.017±0.008 | 0.022±0.01  | 0.012±0.002 | 0.02±0.01   | 0.029±0.013 | 0.042±0.011 | 0.042±0.021 |

|                                 |        |            |      |             |             |             |             |             |             |             |
|---------------------------------|--------|------------|------|-------------|-------------|-------------|-------------|-------------|-------------|-------------|
| Benzeneacetaldehyde             | MS, RI | 122-78-1   | 1640 | 0.155±0.067 | 0.12±0.043  | 0.207±0.065 | ND          | 0.186±0.01  | 0.715±0.176 | 0.212±0.089 |
| Dodecanal                       | MS, RI | 112-54-9   | 1716 | 0.011±0.011 | 0.028±0.004 | 0.01±0.003  | 0.025±0.012 | 0.006±0.002 | 0.027±0.01  | 0.011±0.007 |
| 2-Phenyl-2-Butenal              | MS, RI | 4411-89-6  | 1907 | 0.011±0.005 | 0.036±0.016 | ND          | 0.012±0.004 | 0.024±0.01  | 0.12±0.034  | 0.14±0.059  |
| Σ                               |        |            |      | 0.382±0.141 | 0.29±0.104  | 0.255±0.074 | 0.353±0.137 | 0.678±0.115 | 1.084±0.233 | 0.886±0.298 |
| Ketones                         |        |            |      |             |             |             |             |             |             |             |
| 3-Octen-2-one                   | MS, RI | 1669-44-9  | 1429 | 0.029±0.008 | 0.02±0.008  | ND          | ND          | ND          | ND          | ND          |
| 1-Phenyl-ethanone               | MS, RI | 98-86-2    | 1652 | 0.038±0.012 | ND          | 0.049±0.01  | ND          | 0.058±0.004 | 0.136±0.02  | 0.063±0.02  |
| 2-Tridecanone                   | MS, RI | 593-08-8   | 1817 | ND          | 0.006±0.004 | ND          | ND          | ND          | 0.095±0.013 | ND          |
| Geranylacetone                  | MS, RI | 3796-70-1  | 1862 | ND          | ND          | 0.029±0.011 | ND          | 0.026±0.003 | 0.083±0.012 | 0.032±0.003 |
| 2-Pentadecanone                 | MS, RI | 2345-28-0  | 2041 | ND          | 0.013±0.006 | 0.007±0.002 | 0.005±0.002 | 0.005±0     | 0.032±0.005 | 0.013±0.006 |
| Fitone                          | MS, RI | 502-69-2   | 2110 | 0.017±0.007 | 0.014±0.004 | ND          | 0.014±0.006 | 0.017±0.003 | 0.018±0.004 | ND          |
| Σ                               |        |            |      | 0.084±0.026 | 0.053±0.02  | 0.084±0.023 | 0.019±0.008 | 0.107±0.005 | 0.333±0.028 | 0.108±0.028 |
| Pyrazines                       |        |            |      |             |             |             |             |             |             |             |
| 2-Methylpyrazine                | MS, RI | 109-08-0   | 1274 | ND          | ND          | 0.026±0.009 | 0.018±0.009 | ND          | 0.026±0.012 | ND          |
| 2,5-Dimethylpyrazine            | MS, RI | 123-32-0   | 1316 | ND          | 0.006±0     | 0.009±0.003 | 0.063±0.01  | ND          | 0.033±0.008 | 0.007±0.001 |
| 2,6-Dimethylpyrazine            | MS, RI | 108-50-9   | 1328 | ND          | 0.034±0.012 | 0.075±0.026 | 0.054±0.01  | 0.047±0.008 | 0.11±0.015  | 0.062±0.02  |
| 2,3-Dimethylpyrazine            | MS, RI | 5910-89-4  | 1335 | ND          | 0.006±0.002 | 0.065±0.026 | 0.017±0.006 | 0.009±0.003 | 0.127±0.016 | 0.02±0.011  |
| 2-Ethyl-6-methylpyrazine        | MS, RI | 13925-03-6 | 1381 | 0.011±0.006 | 0.019±0.008 | 0.032±0.014 | 0.017±0.003 | 0.027±0.004 | 0.059±0.014 | 0.031±0.008 |
| 2-Ethyl-5(6)-methylpyrazine     | MS, RI | 13360-64-0 | 1399 | ND          | 0.036±0.019 | 0.003±0.001 | ND          | 0.018±0.007 | 0.023±0.013 | ND          |
| 2,3,5-Trimethylpyrazine         | MS, RI | 14667-55-1 | 1391 | 0.108±0.018 | 0.055±0.021 | 0.375±0.118 | 0.114±0.026 | 0.055±0.001 | 0.903±0.168 | 0.107±0.03  |
| 2,3-Dimethyl-5-ethylpyrazine    | MS, RI | 15707-34-3 | 1445 | 0.064±0.032 | 0.023±0.008 | 0.077±0.024 | 0.034±0.001 | 0.025±0.012 | 0.2±0.077   | ND          |
| Tetramethylpyrazine             | MS, RI | 1124-11-4  | 1457 | 0.421±0.199 | 0.028±0.01  | 1.44±0.47   | 0.049±0.006 | 0.027±0.005 | 3.718±0.848 | 0.054±0.014 |
| 2-Methyl-6-vinyl pyrazine       | MS, RI | 13925-09-2 | 1485 | ND          | 0.027±0.014 | 0.037±0.019 | 0.023±0.006 | 0.056±0.003 | 0.11±0.021  | 0.039±0.016 |
| 2,3,5-Trimethyl-6-ethylpyrazine | MS, RI | 17398-16-2 | 1491 | ND          | ND          | 0.052±0.032 | ND          | ND          | 0.21±0.059  | ND          |
| Σ                               |        |            |      | 0.603±0.241 | 0.217±0.082 | 2.181±0.743 | 0.389±0.073 | 0.263±0.024 | 5.519±1.225 | 0.321±0.1   |

|                          |        |           |      |             |             |             |             |             |             |             |
|--------------------------|--------|-----------|------|-------------|-------------|-------------|-------------|-------------|-------------|-------------|
| Alkanes                  |        |           |      |             |             |             |             |             |             |             |
| 3-Methyltridecane        | MS, RI | 6418-41-3 | 1349 | 0.013±0.006 | 0.013±0.005 | 0.018±0.007 | 0.014±0.005 | 0.019±0.005 | 0.028±0.008 | 0.028±0.013 |
| Tetradecane              | MS, RI | 629-59-4  | 1400 | 0.061±0.021 | 0.042±0.016 | 0.056±0.017 | 0.072±0.01  | 0.044±0.012 | 0.115±0.009 | 0.083±0.024 |
| Hexadecane               | MS, RI | 544-76-3  | 1600 | 0.043±0.041 | 0.112±0.081 | 0.075±0.013 | 0.077±0.033 | 0.028±0.005 | 0.111±0.065 | 0.042±0.027 |
| Heptadecane              | MS, RI | 629-78-7  | 1700 | 0.024±0.023 | ND          | 0.022±0.008 | 0.029±0.006 | 0.011±0.003 | 0.036±0.008 | 0.024±0.009 |
| Octadecane               | MS, RI | 593-45-3  | 1800 | ND          | 0.292±0.121 | 0.09±0.031  | 0.14±0.038  | 0.031±0.007 | 0.099±0.032 | 0.038±0.019 |
| Σ                        |        |           |      | 0.141±0.09  | 0.362±0.269 | 0.26±0.052  | 0.285±0.106 | 0.123±0.02  | 0.389±0.077 | 0.215±0.078 |
| Arenes                   |        |           |      |             |             |             |             |             |             |             |
| 1,3-Di-tert-butylbenzene | MS, RI | 1014-60-4 | 1426 | 1.345±0.389 | 1.033±0.255 | 1.261±0.462 | 1.243±0.403 | 1.583±0.273 | 2.412±0.559 | 2.103±0.835 |
| Naphthalene              | MS, RI | 91-20-3   | 1763 | 0.028±0.005 | 0.011±0.004 | ND          | 0.026±0.006 | 0.013±0.001 | 0.035±0.014 | 0.035±0.01  |
| Σ                        |        |           |      | 1.373±0.394 | 1.044±0.258 | 1.261±0.462 | 1.269±0.409 | 1.596±0.274 | 2.447±0.568 | 2.137±0.845 |
| Phenols                  |        |           |      |             |             |             |             |             |             |             |
| Phenol hydroxide         | MS, RI | 108-95-2  | 2030 | 0.079±0.039 | ND          | 0.054±0.017 | 0.032±0.009 | 0.061±0.003 | ND          | ND          |
| 2-Methoxy-4-vinylphenol  | MS, RI | 7786-61-0 | 2212 | 0.023±0.012 | ND          | ND          | 0.025±0.012 | 0.027±0     | 0.275±0.153 | 0.025±0.015 |
| 2,4-Di-tert-butylphenol  | MS, RI | 96-76-4   | 2330 | 0.305±0.154 | 0.304±0.161 | 0.375±0.111 | 0.395±0.091 | 0.186±0.014 | 0.279±0.042 | ND          |
| Σ                        |        |           |      | 0.407±0.204 | 0.304±0.161 | 0.429±0.128 | 0.452±0.094 | 0.274±0.014 | 0.554±0.16  | 0.025±0.015 |
| Others                   |        |           |      |             |             |             |             |             |             |             |
| Veratrole                | MS, RI | 91-16-7   | 1706 | 0.034±0.016 | ND          | 0.101±0.033 | 0.017±0.005 | ND          | 0.14±0.036  | ND          |
| Butylated Hydroxytoluene | MS, RI | 128-37-0  | 1932 | 0.028±0.001 | 0.022±0.01  | 0.039±0.036 | 0.016±0.007 | 0.016±0.014 | ND          | 0.007±0.004 |
| 2-Acetylpyrrole          | MS, RI | 1072-83-9 | 1974 | 0.013±0.003 | ND          | 0.049±0.005 | ND          | 0.088±0.005 | 0.129±0.048 | 0.062±0.017 |
| Σ                        |        |           |      | 0.061±0.029 | 0.022±0.01  | 0.189±0.073 | 0.033±0.006 | 0.104±0.019 | 0.269±0.072 | 0.069±0.02  |

\* RI, Retention indices, were determined by using n-alkanes C7-C30.

\* MS, mass spectrometry.

\* ND, not detected.
